# Supplementary material
Source: HighWire-hosted journal article supplement (https://www.cmajopen.ca/highwire/filestream/84473/field_highwire_adjunct_files/0/2020-0112-1-at.pdf)
Supplement: 2020-0112-1-at.pdf [file 2020-0112-1-at.pdf]

**Appendix 1 (as supplied by the authors): Prevalence (%) of food security status and poor or fair mental health by age and sex**

|                        |                |                    | Food security status (%) | Mental health struggles (%) |
|------------------------|----------------|--------------------|--------------------------|-----------------------------|
| <b>18 to 39 years</b>  | <b>females</b> | <b>Food secure</b> | 89.8                     | 5.5                         |
|                        |                | <b>moderate</b>    | 9.7                      | 15.6                        |
|                        |                | <b>severe</b>      | 5.1                      | 27.6                        |
|                        | <b>males</b>   | <b>Food secure</b> | 88.6                     | 4.6                         |
|                        |                | <b>moderate</b>    | 7.0                      | 12.4                        |
|                        |                | <b>severe</b>      | 4.5                      | 25.3                        |
| <b>40 to 64 years</b>  | <b>females</b> | <b>Food secure</b> | 89.9                     | 5.6                         |
|                        |                | <b>moderate</b>    | 5.6                      | 20.1                        |
|                        |                | <b>severe</b>      | 4.5                      | 37.7                        |
|                        | <b>males</b>   | <b>Food secure</b> | 92.3                     | 5.6                         |
|                        |                | <b>moderate</b>    | 4.1                      | 20.9                        |
|                        |                | <b>severe</b>      | 3.6                      | 32.5                        |
| <b>65 years and up</b> | <b>females</b> | <b>Food secure</b> | 96.3                     | 4.5                         |
|                        |                | <b>moderate</b>    | 2.5                      | 14.5                        |
|                        |                | <b>severe</b>      | 1.3                      | 21.0                        |
|                        | <b>males</b>   | <b>Food secure</b> | 97.4                     | 4.9                         |
|                        |                | <b>moderate</b>    | 1.7                      | 18.2                        |
|                        |                | <b>severe</b>      | 0.9                      | 30.9                        |
